# Supplementary material for: A novel flux coating method for the fabrication of layers of visible-light-responsive Ta3N5crystals on tantalum substrates
Source: Royal Society of Chemistry journal article supplement (doi:10.1039/c5ta01724f), 2015-01-01
Supplement: c5ta01724f1.pdf [file c5ta01724f1.pdf]

**Electronic Supplementary Information (ESI)**

**Novel Flux Coating Method for Fabrication of Layer of Visible-Light-Responsive Ta<sub>3</sub>N<sub>5</sub> Crystals on Tantalum Substrate**

Sayaka Suzuki,<sup>a</sup> Hajime Wagata,<sup>a</sup> Mugi Komatsu,<sup>a</sup> Tsutomu Minegishi,<sup>b</sup> Kazunari Domen,<sup>b</sup> Shuji Oishi<sup>a</sup> and Katsuya Teshima<sup>\*,a,c</sup>

<sup>a</sup>Department of Environmental Science and Technology, Faculty of Engineering, Shinshu University, 4-17-1 Wakasato, Nagano 380-8553, Japan

<sup>b</sup>Department of Chemical System Engineering, School of Engineering, The University of Tokyo, 7-3-1 Hongo, Bunkyo-ku, Tokyo 113-8656, Japan

<sup>c</sup>Center for Energy and Environmental Science, Shinshu University, 4-17-1 Wakasato, Nagano 380-8553, Japan

*E-mail: teshima@shinshu-u.ac.jp*

*\*Corresponding Author: Katsuya Teshima*

## Materials and reagents

To fabricate the Ta<sub>3</sub>N<sub>5</sub> crystal layers, Ta foil (99.95 %, Nilaco Corporation), NaNO<sub>3</sub> (99.0 %, Wako Pure Industries, Ltd.), NaCl (99.5 %, Wako Pure Industries, Ltd.), and Na<sub>2</sub>CO<sub>3</sub> (99.8 %, Wako Pure Industries, Ltd.) were used. The solution-coated substrates were heated using NH<sub>3</sub> (99.9995 %, Sumitomo Seika Chemicals Co., Ltd.) and N<sub>2</sub> (99.9995 %, Taiyo Nippon Sanso Corporation) gases. For the modification using a cocatalyst, Co(NO<sub>3</sub>)<sub>2</sub>·6H<sub>2</sub>O (99.5 %, Wako Pure Industries, Ltd.), K<sub>2</sub>HPO<sub>4</sub> (99.0 %, Kanto Chemicals), KH<sub>2</sub>PO<sub>4</sub> (99.5 %, Kanto Chemicals), Na<sub>2</sub>SO<sub>4</sub> (99.0 %, Wako Pure Industries, Ltd.), and NaOH (97.0 %, Wako Pure Industries, Ltd.) were used. All the chemicals were used as-purchased without further purification.

## Fabrication of samples for UV-vis spectral measurements

We could not measure the Kubelka-Munk spectrum for the Ta<sub>3</sub>N<sub>5</sub> crystal layers on the Ta substrate with accuracy, because of absorption by the Ta substrate. Therefore, we fabricated the Ta<sub>3</sub>N<sub>5</sub> crystal layers on a silica-glass substrate, and subsequently measured their light absorption properties in the transmission mode.

First, a layer of Ta was deposited on the silica-glass substrate (20 × 20 × 0.5 mm) by sputtering (Kenix Co., Ltd., RF sputter system, KXS-410B) using a Ta target (99.99 %, High Purity Chemicals). The deposited Ta layer had a thickness of approximately 60 nm. The subsequent procedures for the fabrication of the Ta<sub>3</sub>N<sub>5</sub> crystal layers were basically the same as those of the fabrication of the layers on the Ta substrates. The Ta layer was dry-cleaned and hydrophilized by being irradiated under vacuum-ultraviolet light ( $\lambda = 172$  nm). Next, 13.3  $\mu$ L of the NaCl-Na<sub>2</sub>CO<sub>3</sub> aqueous solution was placed on the Ta layer. Because 5  $\mu$ L of the solution was used for the Ta substrates, which had dimensions of 10 × 15 mm, the amount of solution used was increased to 13.3  $\mu$ L for the silica-glass substrates, which were larger in size (dimensions of 20 × 20 mm). The solution-coated substrates were dried in an electric oven at 100 °C for 30 min. Subsequently, the substrates were heated to 850 °C at a rate of 10 °C·min<sup>-1</sup> and held at this temperature for 1 h in an NH<sub>3</sub> flow (100 mL·min<sup>-1</sup>).

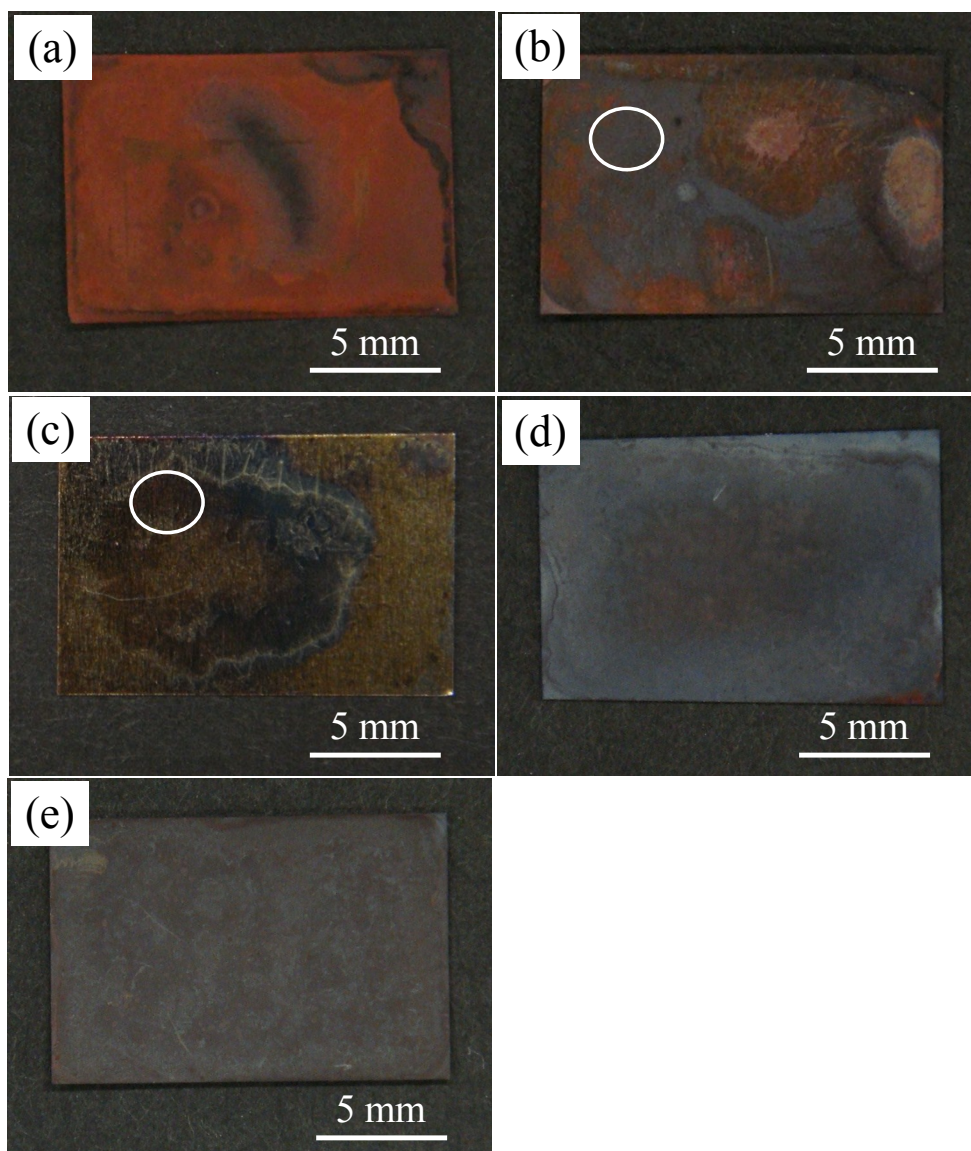

Fig. S1 Digital photographs of the crystal layers fabricated using (a)  $\text{NaNO}_3$  (Run No. 1), (b)  $\text{Na}_2\text{CO}_3$  (Run No. 2), (c)  $\text{NaCl}$  (Run No. 3), and (d, e)  $\text{NaCl-Na}_2\text{CO}_3$  as the fluxes. (d)  $10\ \mu\text{L}$  (Run No. 4) and (e)  $5\ \mu\text{L}$  (Run No. 5) of an aqueous  $\text{NaCl-Na}_2\text{CO}_3$  solution were used as the fluxes.

Table S1 Crystallite sizes of the crystal layers fabricated using the various fluxes.

| run<br>no. | flux (molar ratio)                    | amount of<br>coating<br>/ $\mu\text{L}$ | crystallite<br>size / nm |
|------------|---------------------------------------|-----------------------------------------|--------------------------|
| 1          | $\text{NaNO}_3$                       | 10                                      | 18.3                     |
| 2          | $\text{Na}_2\text{CO}_3$              | 10                                      | 18.0                     |
| 3          | $\text{NaCl}$                         | 10                                      | 36.6                     |
| 4          | $\text{NaCl-Na}_2\text{CO}_3$ (4 : 1) | 10                                      | 31.1                     |
| 5          | $\text{NaCl-Na}_2\text{CO}_3$ (4 : 1) | 5                                       | 36.1                     |

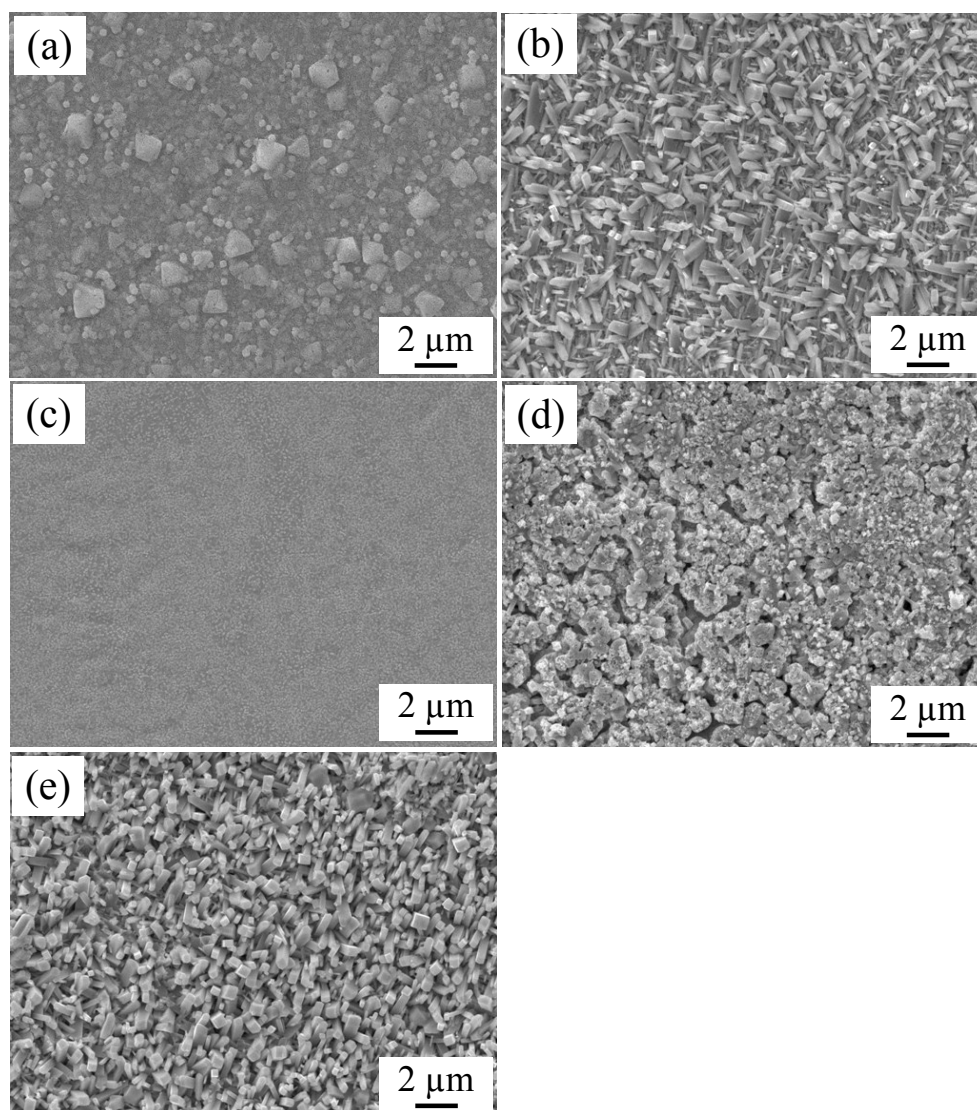

Fig. S2 Low-magnification surface SEM images of the crystal layers fabricated using (a)  $\text{NaNO}_3$  (Run No. 1), (b)  $\text{Na}_2\text{CO}_3$  (Run No. 2), (c)  $\text{NaCl}$  (Run No. 3), and (d, e)  $\text{NaCl-Na}_2\text{CO}_3$  as the fluxes. (d) 10  $\mu\text{L}$  (Run No. 4) and (e) 5  $\mu\text{L}$  (Run No. 5) of an aqueous  $\text{NaCl-Na}_2\text{CO}_3$  solution were used as the fluxes.

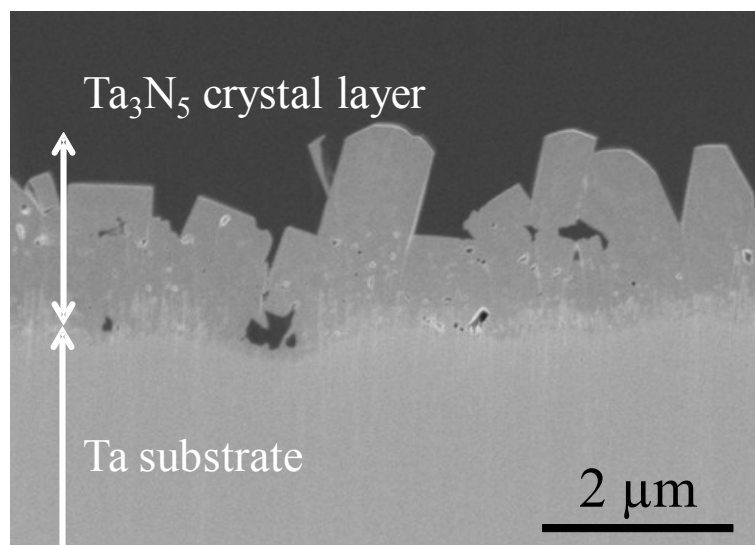

Fig. S3 Cross-sectional SEM image of the crystal layer fabricated using NaCl-Na<sub>2</sub>CO<sub>3</sub> as the flux at 850 °C for 1 h (Run No. 5).

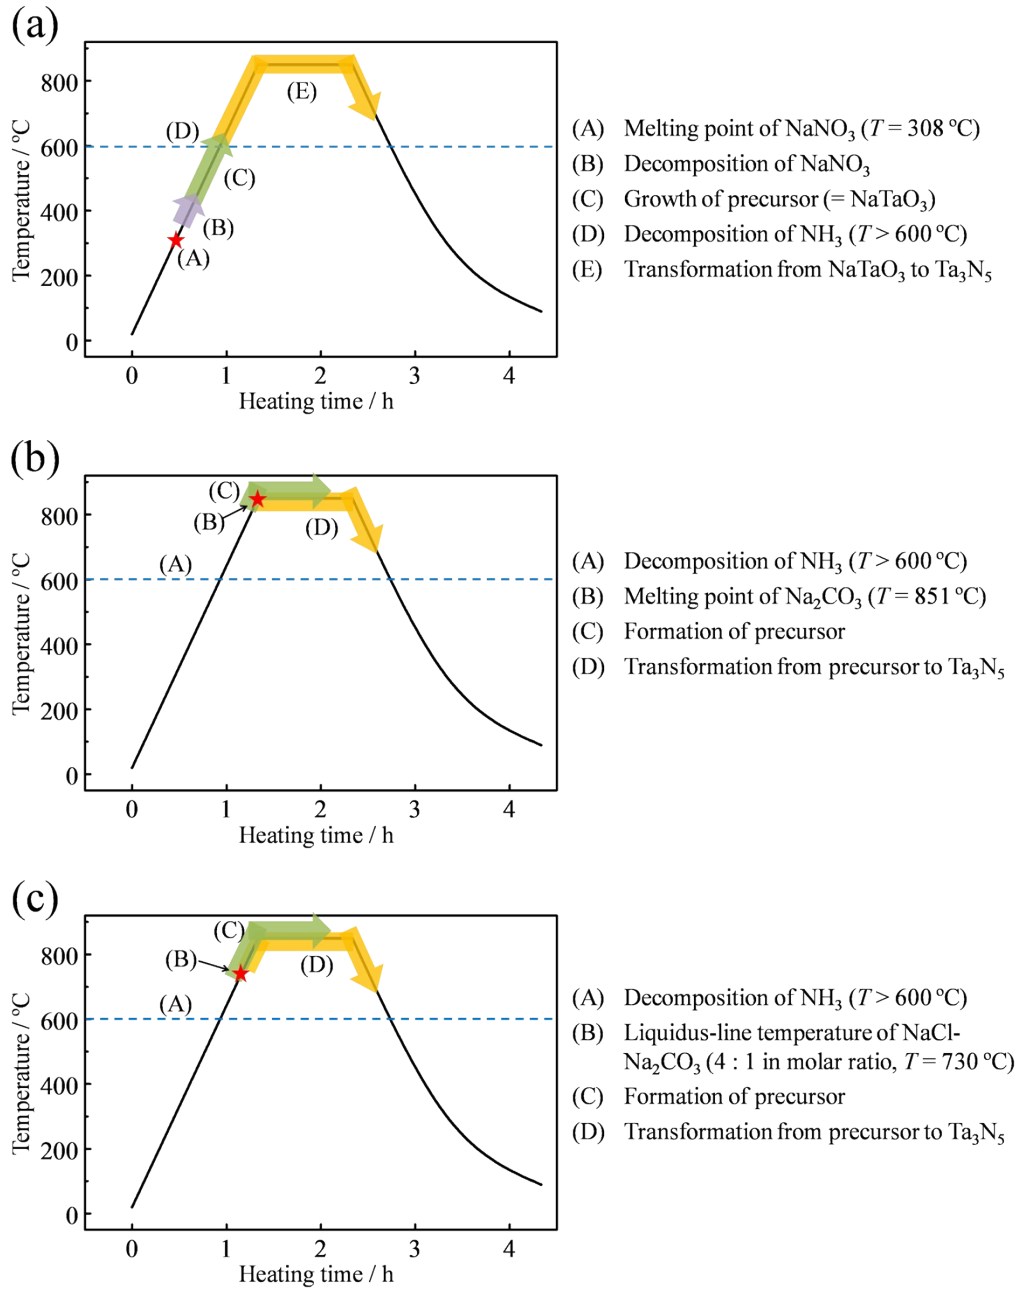

Fig. S4 Illustration of the formation mechanism of  $\text{Ta}_3\text{N}_5$  crystal layers using (a)  $\text{NaNO}_3$ , (b)  $\text{Na}_2\text{CO}_3$ , and (c)  $\text{NaCl-Na}_2\text{CO}_3$  as the fluxes.

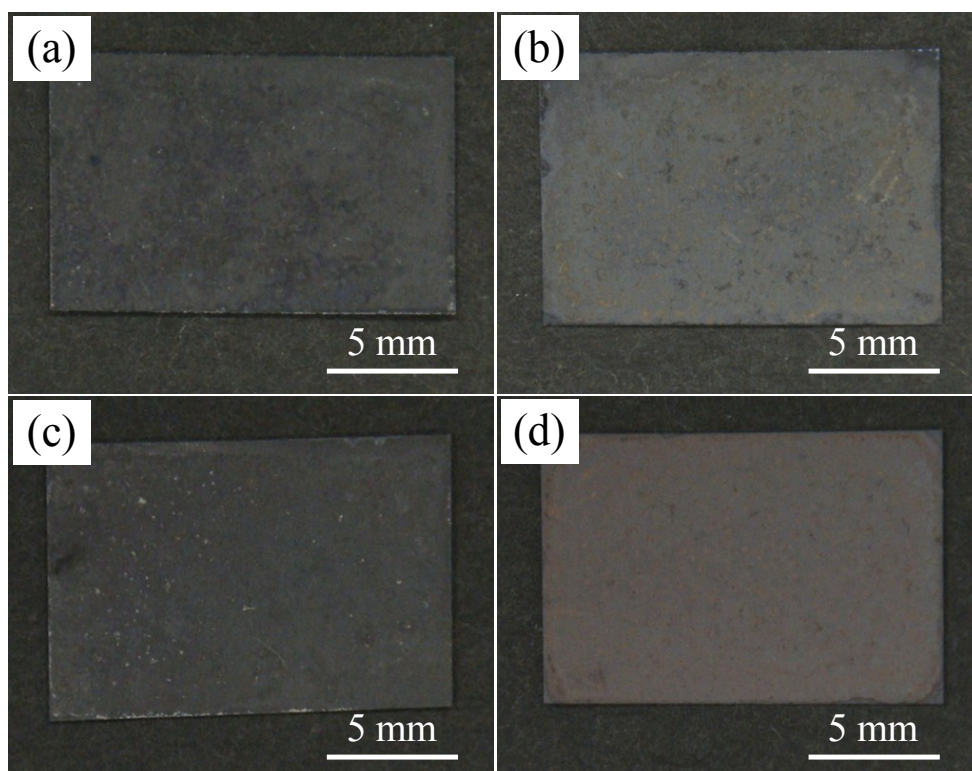

Fig. S5 Digital photographs of the crystal layers fabricated using NaCl-Na<sub>2</sub>CO<sub>3</sub> as the flux at different holding temperatures and a holding time of 0 h: (a) 700 °C (Run No. 6), (b) 750 °C (Run No. 7), (c) 800 °C (Run No. 8), and (d) 850 °C (Run No. 9).

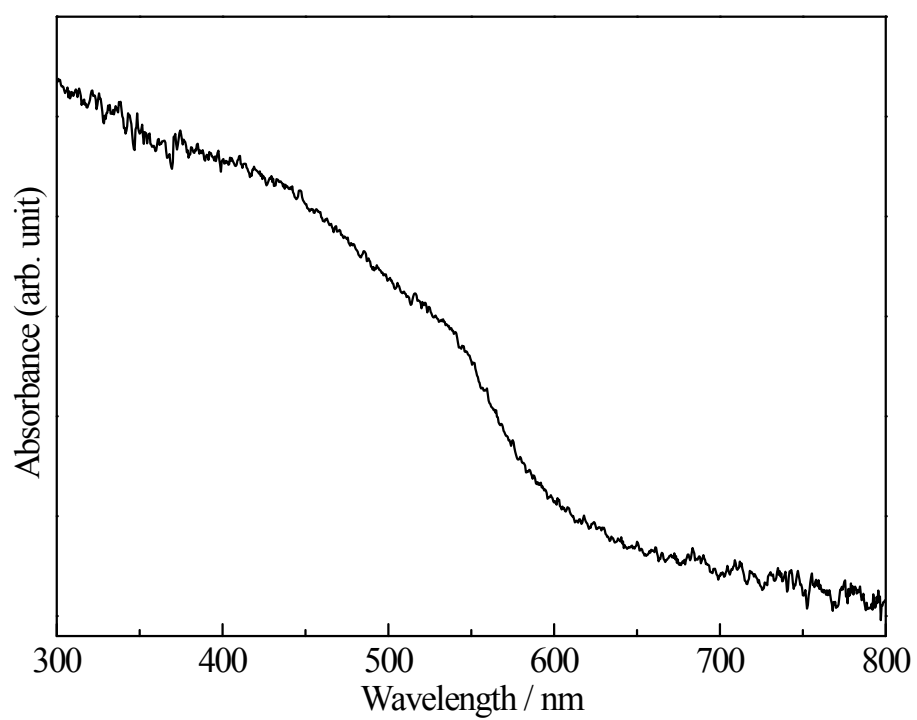

Fig. S6 UV-vis absorption spectrum of the crystal layers fabricated on the silica-glass substrate using NaCl-Na<sub>2</sub>CO<sub>3</sub> as the flux at 850 °C for 1 h.
